# Supplementary material
Source: PubMed Central journal article supplement (PMC6467812)
Supplement: NIHMS1021546-supplement-2.pdf [file NIHMS1021546-supplement-2.pdf]

# **A plug-and-play, drug-on-pillar platform for combination drug screening implemented by microfluidic adaptive printing**

Jiannan Li<sup>1, §</sup>, Wen Tan<sup>1,3, §</sup>, Wenwu Xiao<sup>2</sup>, Randy P. Carney<sup>2</sup>, Yongfan Men<sup>1,4</sup>, Yuanpei Li<sup>2</sup>, Gerald Quon<sup>5</sup>, Yousif Ajena<sup>2</sup>, Kit S. Lam<sup>2\*</sup>, and Tingrui Pan<sup>1,4\*</sup>

1. Micro-Nano Innovations (MiNI) Laboratory, Department of Biomedical Engineering, Department of Electrical and Computer Engineering, University of California, Davis, California, USA, 95616

2. Department of Biochemistry and Molecular Medicine, School of Medicine, UC Davis NCI-designated Comprehensive Cancer Center, University of California Davis, Sacramento, California, USA, 95817

3. School of Pharmacy, Lanzhou University, Lanzhou, Gansu province, China, 730000

4. Shenzhen Institutes of Advanced Technology, Chinese Academy of Sciences, Shenzhen, Guangdong, China, 518055

5. Department of Molecular and Cellular Biology, University of California, Davis, California, USA, 95616

\*To whom correspondence should be addressed. Phone: +1 916-7340910; +1 530-7549508. E-mail: kslam@ucdavis.edu; tingrui@ucdavis.edu

## Table of contents

|                                                                               |   |
|-------------------------------------------------------------------------------|---|
| Figure S1. Pictures of pillar arrays with different sizes.....                | 2 |
| Figure S2. Microfluidic cartridge fabrication process and demonstration. .... | 2 |
| Figure S3. Nano formulated doxorubicin long term stability verification. .... | 2 |
| Figure S4. Drug library design strategy.....                                  | 3 |
| Figure S5. Drug library layout in a 1536 well plate. ....                     | 3 |

## Supporting Information

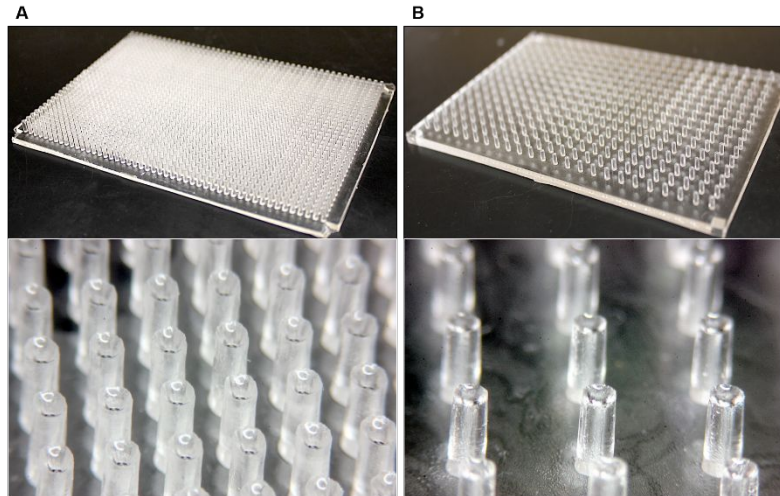

Figure S1. Pictures of pillar arrays with different sizes: A, 1536-scale and B, 384-scale array.

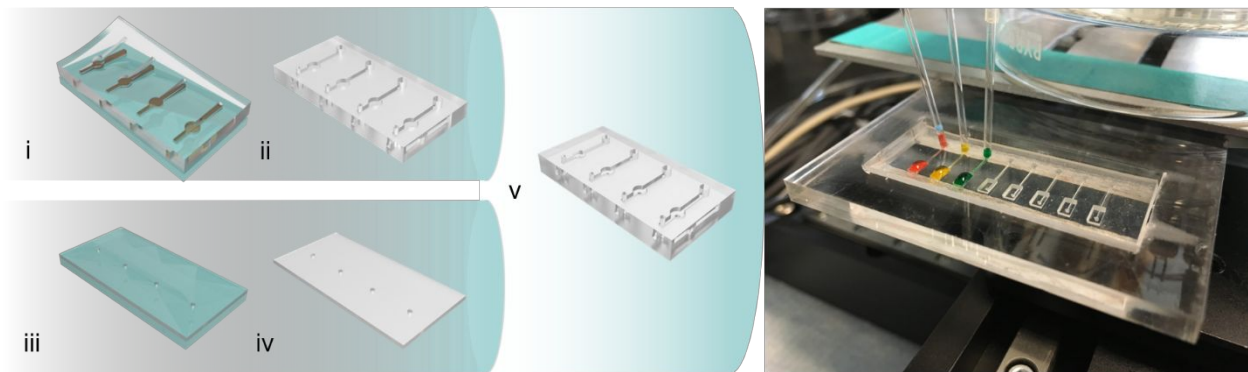

Figure S2. Microfluidic cartridge fabrication process and demonstration. i, cast liquid PDMS on a SU-8 mold and peel off; ii, resulted top layer structure; iii, spin coating bottom layer and laser cut nozzles; iv, resulted bottom layer structure; v, bonding of top and bottom layer and resulted cartridge as a whole piece.

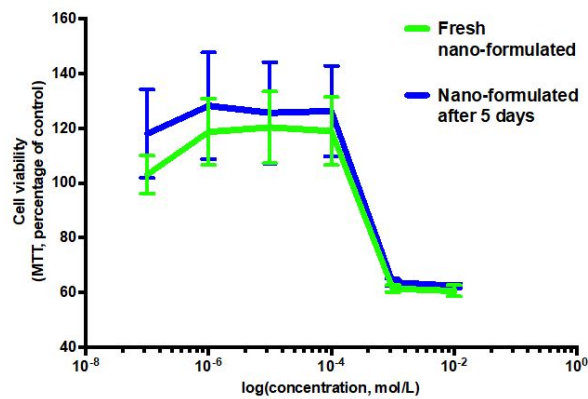

Figure S3. Nano formulated doxorubicin long term stability verification.

# Supporting Information

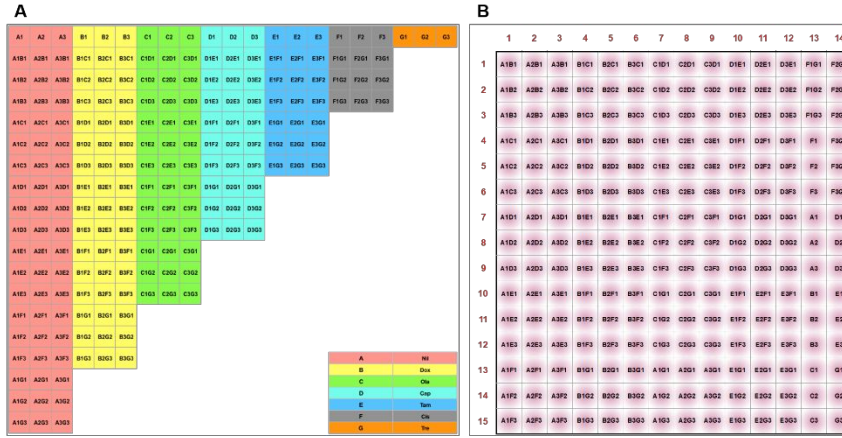

Figure S4. Drug library design strategy: A, original drug pair design; B, fitting the design to a 14 by 15 array.

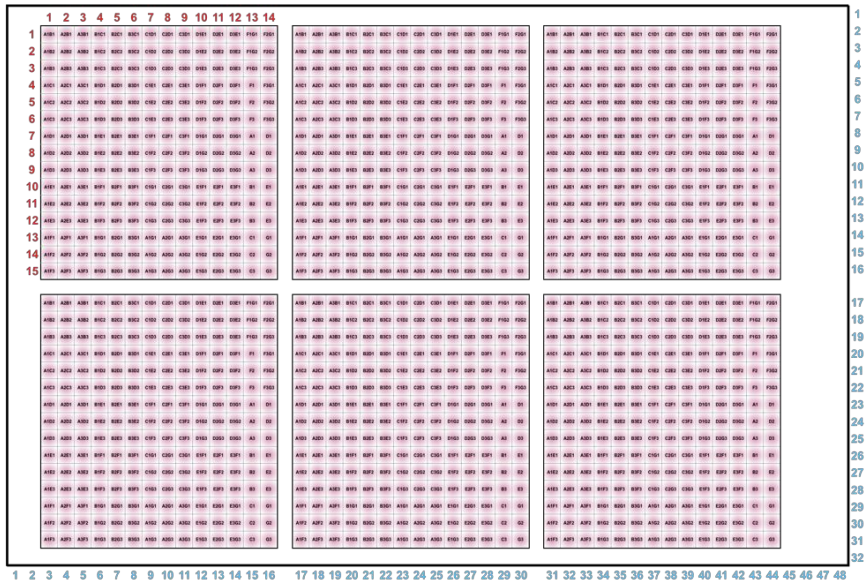

Figure S5. Drug library layout in a 1536 well plate.
